1 **Contribution of host species and pathogen clade to snake fungal disease hotspots in Europe**

2

3 Gaëlle Blanvillain<sup>1\*</sup>, Jeffrey M. Lorch<sup>2</sup>, Nicolas Joudrier<sup>3,4,5</sup>, Stanislaw Bury<sup>6,7</sup>, Thibault

4 Cuenot<sup>8</sup>, Michael Franzen<sup>9</sup>, Fernando Martínez-Freiría<sup>10,11</sup>, Gaëtan Guiller<sup>12</sup>, Bálint Halpern<sup>13,14</sup>,

5 Aleksandra Kolanek<sup>15,7</sup>, Katarzyna Kurek<sup>16</sup>, Olivier Lourdais<sup>17,18</sup>, Alix Michon<sup>8</sup>, Radka

6 Musilová<sup>19</sup>, Silke Schweiger<sup>20</sup>, Barbara Szulc<sup>7,21</sup>, Sylvain Ursenbacher<sup>5,22,23</sup>, Oleksandr

7 Zinenko<sup>24</sup> and Joseph R. Hoyt<sup>1</sup>

8

9 <sup>1</sup> Biological Sciences Department, Virginia Polytechnic Institute and State University, Blacksburg,

10 VA, USA

11 <sup>2</sup> U.S. Geological Survey, National Wildlife Health Center, Madison, WI, USA

12 <sup>3</sup> Institute of Biology, University of Neuchâtel, Neuchâtel, Switzerland

13 <sup>4</sup> Institute of Animal Pathology, University of Bern, Bern, Switzerland

14 <sup>5</sup> Info fauna-Karch, Centre Suisse de Cartographie de la Faune (CSCF) and Centre de coordination

15 pour la protection des reptiles et des amphibiens de Suisse (karch), Neuchâtel, Switzerland

16 <sup>6</sup> Department of Comparative Anatomy, Institute of Zoology and Biomedical Research, Jagiellonian

17 University, Cracow, Poland

18 <sup>7</sup> NATRIX Herpetological Association, Wrocław, Poland

19 <sup>8</sup> LPO Bourgogne-Franche-Comté, Comité territorial de Franche-Comté, Maison de l'environnement

20 de BFC, Besançon, France

21 <sup>9</sup> Bavarian State Collection of Zoology (ZSM-SNSB), Munich, Germany

22 <sup>10</sup> CIBIO, Centro de Investigação em Biodiversidade e Recursos Genéticos, InBIO Laboratório

23 Associado, Campus de Vairão, University of Porto, Vairão, Portugal

- 24 <sup>11</sup> BIOPOLIS Program in Genomics, Biodiversity and Land Planning, CIBIO, Campus de Vairão,  
25 Vairão, Portugal
- 26 <sup>12</sup> Le Grand Momeson, Bouvron, France
- 27 <sup>13</sup> MME BirdLife Hungary, Budapest, Hungary
- 28 <sup>14</sup> Department of Systematic Zoology and Ecology, Institute of Biology, Eötvös Loránd University,  
29 ELKH-ELTE-MTM Integrative Ecology Research Group, Budapest, Hungary
- 30 <sup>15</sup> Institute of Geography and Regional Development, Faculty of Earth Sciences and Environmental  
31 Management, University of Wrocław, Poland
- 32 <sup>16</sup> Department of Wildlife Conservation, Institute of Nature Conservation Polish Academy of  
33 Science, Cracow, Poland
- 34 <sup>17</sup> Centre d'Etudes Biologiques de Chizé, ULR CNRS UMR 7372, Villiers en Bois, France
- 35 <sup>18</sup> School of Life Sciences, Arizona State University, Tempe, USA
- 36 <sup>19</sup> Zamenis Civic Association, Karlovy Vary, Czech Republic
- 37 <sup>20</sup> First Zoological Department, Herpetological Collection, Natural History Museum, Vienna, Austria
- 38 <sup>21</sup> Department of Genetics, Kazimierz Wielki University, Bydgoszcz, Poland
- 39 <sup>22</sup> Department of Environmental Sciences, Section of Conservation Biology, University of Basel,  
40 Basel, Switzerland
- 41 <sup>23</sup> Balaton Limnological Research Institute, Tihany, Hungary
- 42 <sup>24</sup> V.N. Karazin Kharkiv National University, Kharkiv, Ukraine
- 43
- 44 \* **Corresponding author:** [gaelle.blanvillain@gmail.com](mailto:gaelle.blanvillain@gmail.com)
- 45
- 46 **Keywords:** disease hotspots; fungal pathogen; host-pathogen interactions; *Ophidiomyces*  
47 *ophidiicola*; Snake fungal disease

48 **Abstract**

- 49 1. Infectious diseases are influenced by interactions between host and pathogen, and are  
50 rarely homogenous across the landscape. Areas with elevated pathogen prevalence  
51 maintain a high force of infection, can facilitate pathogen spread to new regions, and may  
52 indicate areas with impacts on host populations. However, isolating the ecological  
53 processes that result in increases in infection prevalence and intensity remains a  
54 challenge.
- 55 2. Here we elucidate the contribution of pathogen clade and host species in disease hotspots  
56 of *Ophidiomyces ophidiicola*, the pathogen that causes snake fungal disease, in 21 species  
57 of snakes infected with multiple pathogen strains across 10 countries in Europe.
- 58 3. We found isolated areas of disease hotspots in a landscape where infections were  
59 otherwise low. *O. ophidiicola* clade had important effects on transmission, and areas with  
60 multiple pathogen clades had higher host infection prevalence. Snake species identity  
61 further influenced infection, with most positive detections coming from the *Natrix* genus.  
62 Most species present in the community only experienced increased levels of infection  
63 when multiple strains were present. However, one species, *N. tessellata*, appeared highly  
64 susceptible, having increased infection prevalence regardless of pathogen strain,  
65 indicating that this species may be important in pathogen maintenance.
- 66 4. Our results suggest that both host and pathogen identity are essential components  
67 contributing to increased pathogen prevalence. More broadly, our findings indicate that  
68 coevolutionary relationships between hosts and pathogens may be key mechanisms  
69 explaining variation in landscape patterns of disease.

70

## 71 **Introduction**

72 Infectious diseases can shape ecological communities by altering host abundance and  
73 distributions across the landscape (LaDeau et al. 2007, Holdo et al. 2009, Langwig et al. 2012).  
74 Disease outcomes are determined by host-pathogen interactions which are multifaceted and can  
75 interact with environmental conditions, creating a mosaic of disease hotspots across broad spatial  
76 scales (Krauss et al. 2010, Paull et al. 2012, Brown et al. 2013, Wilber et al. 2020). Hotspots of  
77 high pathogen prevalence may represent potential areas of continued impacts to host populations,  
78 serve as a source for pathogen dispersal, and maintain high propagule pressure within host  
79 communities (Kilpatrick et al. 2006, Krauss et al. 2010, Paull et al. 2012, Brown et al. 2013,  
80 Wilber et al. 2020, Laggan et al. 2022).

81 Heterogeneity in innate species susceptibility is recognized as a strong force influencing  
82 pathogen transmission and disease impacts for multi-host pathogens (van Riper et al. 1986,  
83 LaDeau et al. 2007, Voyles et al. 2009, Langwig et al. 2017). The distribution of highly  
84 susceptible species can determine areas of high prevalence if they are critical in pathogen  
85 maintenance (Haydon et al. 2002, Ashford 2003). However, the disproportionate contribution of  
86 a particular species may be modified by differences in community structure, environmental  
87 conditions among patches, and variation in pathogen virulence (Balaz et al. 2014, Wilber et al.  
88 2020). Pathogen replication rates can also differ among strains and across the landscape,  
89 producing additional variation in disease prevalence (O’Hanlon et al. 2018, Greener et al. 2020).  
90 Pathogen strains with high growth rates and virulence may be due to multiple factors, including  
91 the introduction of novel strains to new locations or hosts (Li et al. 2004, Becker et al. 2017),  
92 ease or independence of transmission from affected hosts (Hawley et al. 2013, Pandey et al.  
93 2022), and the development of novel mutations or adaptations that facilitate the escape from host

94 resistance (McLeod and Gandon 2022). Although the interaction between host species and  
95 pathogen identity is rarely examined, theory suggests that presence of highly resistant host  
96 species could modify the effects of pathogens with high replication rates, creating cold spots of  
97 transmission across the landscape (Gandon and Michalakis 2000). Conversely, highly  
98 transmissible and virulent pathogen strains in the presence of more moderately affected host  
99 species could drive hotspots of infection (Urbina et al. 2018, Ribeiro et al. 2019, McClure et al.  
100 2020).

101         The fungal pathogen *Ophidiomyces ophidiicola*, that causes snake fungal disease (SFD,  
102 also called ophidiomycosis), has been documented in over 42 species of wild snakes across three  
103 continents (Lorch et al. 2016, Burbrink et al. 2017, Franklinos et al. 2017, Meier et al. 2018,  
104 Allender et al. 2020, Davy et al. 2021, Grioni et al. 2021, Sun et al. 2021), and is considered a  
105 serious threat to the conservation of snake populations (Sutherland et al. 2014, Allender et al.  
106 2015). Clinical signs of disease caused by *O. ophidiicola* can range from mild skin lesions, from  
107 which snakes can recover, to severe infections that impair movement, disrupt feeding behavior,  
108 and can ultimately lead to death (Lorch et al. 2016). Although population declines associated  
109 with SFD have been documented in some species of North American snakes (Lorch et al. 2016),  
110 no such declines have been reported in species across Europe, where *O. ophidiicola* has most  
111 likely coexisted with snakes for longer periods of time (Ladner et al. 2022). However, only  
112 limited information is available on *O. ophidiicola* infections across Europe, with just a few  
113 individual snakes confirmed to be infected with this pathogen from mainland Europe (Franklinos  
114 et al. 2017, Marini et al. 2023, Meier et al. 2018, Origgi et al. 2022).

115         Little is known of the origin of *O. ophidiicola*, and to date, three distinct clades of *O.*  
116 *ophidiicola* have been described: clade I, which has been found exclusively in wild snakes in

117 Europe; clade II, which has been reported in wild snakes in North America and Taiwan as well  
118 as in captive snakes on multiple continents; and clade III, which has only been found in captive  
119 snakes (Ladner et al. 2022). The estimation of the most recent common ancestor between clade I  
120 and II (around 2000 years ago), as well as a lack of nonrecombinant intermediates in North  
121 America strongly indicate that *O. ophidiicola* was introduced to North America, potentially  
122 through multiple introduction events (Ladner et al. 2022). More recently, genotyping from a  
123 limited number of samples indicated the presence of both clades I and II in Switzerland dating  
124 back to at least 1959 (Origgi et al. 2022). In addition, slower growth rates have been reported for  
125 clade I strains of *O. ophidiicola*, suggesting that they may be less virulent than clade II strains  
126 (Franklinos et al. 2017). However, prevalence and disease severity associated with the two  
127 strains and how they influence landscape patterns of disease has not been directly compared.

128 To investigate the macroecological patterns of SFD across Europe we examined host and  
129 pathogen factors that may influence pathogen prevalence and disease severity across the  
130 landscape. We evaluated the presence of pathogen hotspots across Europe, examined differences  
131 in pathogen prevalence and disease severity among host species, and determined the effect of *O.*  
132 *ophidiicola* clade on pathogen prevalence and lesion severity. Finally, we combined host species  
133 and pathogen clade to explore factors that may contribute to areas with high pathogen prevalence  
134 across the landscape.

135

## 136 **5. Methods**

### 137 *(a) Location and host species considered*

138 Free-ranging snakes were captured from March 2020 to June 2022 across 10 countries:  
139 Portugal, Spain, France, Switzerland, Germany, Austria, Czech Republic, Hungary, Poland, and

140 Ukraine. The number of sites where snakes were collected ranged from one to nine per country,  
141 for a total of 43 sites (Fig. 1, Table S1). Sites were selected based on preexisting geopolitical  
142 boundaries within each country (e.g., counties or regions), to account for potential large variation  
143 in landscape and geography within each country.

144

145 *(b) Capture and sampling*

146 Snakes were located by visual encounter surveys, an approach frequently used for  
147 sampling snakes (Dorcas and Willson 2009). Surveys were guided by pre-existing knowledge of  
148 snake presence or prediction of suitable habitats to sample as many species and individuals as  
149 possible, and in a wide variety of habitat types. Snakes were captured by hand, placed in  
150 individual cloth bags for temporary holding during processing and sampling, and released at their  
151 capture location. Sterile handling procedures, including frequent glove changes and  
152 decontamination of gear between each snake were followed during sample collection to avoid  
153 cross-contamination. Snakes were individually identified using photo-identification or marking  
154 (using PIT tags or scale-clipping). For each snake captured, location and morphometric data  
155 were collected including latitude/longitude, species, sex, snout-vent-length, tail length, and  
156 weight.

157 Snakes were swabbed in duplicate (except for a few individuals that were swabbed only  
158 once due to limitations in the field) using a pre-moistened, sterile polyester-tipped applicator  
159 (Puritan<sup>®</sup>, Guilford, Maine, USA) by running the swab five times (back and forth counting as a  
160 single pass) on the ventral and dorsal areas (from the neck down to the vent), and two times on  
161 the face of the snake. If a skin lesion was observed, a separate swab was used to specifically  
162 swab the lesion and skin immediately adjacent to it by rubbing the swab over the affected skin.

163 In addition, for all snakes that had visible lesions, we collected photos for later quantification of  
164 infection severity (see below). Swab tips were individually stored in a 2 mL sterile tube in a  
165 cooler with ice while in the field, and later stored frozen at -20°C until analysis.

166

167 *(c) Sample extraction and qPCR*

168 A total of 2628 swabs were collected and processed by one of two laboratories following  
169 the exact same methods as described below. DNA was extracted from swabs using 250 µL of  
170 PrepMan® Ultra Sample Preparation Reagent (Life Technologies, Carlsbad, California, USA)  
171 with 100 mg of zirconium/silica beads, following a previously published protocol (Hyatt et al.  
172 2007). Briefly, samples were homogenized for 45 sec in a bead beating grinder and lysis system  
173 (MP Biomedicals, Irvine, California, USA) and centrifuged for 30 sec at 13000 g to settle all  
174 material to the bottom of the tube. Homogenization and centrifugation steps were repeated, and  
175 tubes were incubated at 100°C in a heat block for 10 min. Tubes were then cooled at room  
176 temperature for 2 min, then centrifuged for 3 min at 13000 g. Fifty to 100 µL of supernatant was  
177 recovered and stored at -80°C. Extraction blanks (negative controls) were prepared using 250 µL  
178 of PrepMan® Ultra Sample Preparation Reagent and 10 mg of zirconium/silica beads only.

179 Quantitative PCR targeting the internal transcribed spacer region (ITS) specific to *O.*  
180 *ophidiicola* was performed on a real-time PCR QuantStudio 5 (ThermoFisher Scientific,  
181 Waltham, Massachusetts, USA) (Bohuski et al. 2015). QuantiFast Master Mix (QuantiFast Probe  
182 PCR + ROX vial kit, Qiagen, Germantown, USA) was prepared according to manufacturer's  
183 recommendations for a final reaction volume of 25 µL, which included 5 µL of extracted DNA.  
184 Cycling conditions were as follows: 95°C for 3 min, then 95°C for 3 sec and 60°C for 30 sec for  
185 a total of 40 cycles. For each plate run, a negative control (water added instead of extracted



186 DNA) and a 6-point (each point run in triplicate) standard curve using synthetic double-stranded  
187 DNA (gBlock, Integrated DNA Technologies, Coralville, Iowa) of the target region ( $1.0 \times 10^2$ ,  
188  $1.0 \times 10^1$ ,  $1.0 \times 10^0$ ,  $1.0 \times 10^{-1}$ ,  $1.0 \times 10^{-2}$ ,  $1.0 \times 10^{-3}$  fg/ $\mu$ L) were included. Samples that were  
189 positive were analyzed in duplicate, and a snake was determined to be positive if any swab  
190 associated with that snake was positive by qPCR.

191

#### 192 (d) Sequencing and genotyping

193 Samples in which *O. ophidiicola* was detected by qPCR were subjected to follow up  
194 genotyping analysis. We targeted a portion of the internal transcribed spacer 2 (ITS2) for this  
195 analysis because the ITS2 exhibits variability between previously described clades of *O.*  
196 *ophidiicola* and because ITS2 is a multicopy gene that can be amplified from samples containing  
197 very small amounts of *O. ophidiicola* DNA (it is also the target of the qPCR assay). We used a  
198 nested PCR protocol that consisted of first amplifying the entire ITS2 region with the panfungal  
199 primer ITS3 and ITS4 (White et al. 1990). The first reaction consisted of 10  $\mu$ L of 2x  
200 QuantiNova probe PCR master mix (Qiagen, Venlo, Netherlands), 3.9  $\mu$ L of molecular grade  
201 water, 0.5  $\mu$ L of each primer (20  $\mu$ M each), 0.1  $\mu$ L of 20 $\mu$ g/ $\mu$ L bovine serum albumin, and 5  $\mu$ L  
202 of DNA extracted with the PrepMan procedure described above. Cycling conditions were as  
203 follows: 95°C for 3 min; 40 cycles of 95°C for 10 sec, 56°C for 30 sec, and 72°C for 30 sec; final  
204 extension at 72°C for 5 min. For the second reaction, primers ITS3 and Oo-rt-ITS-R (Bohuski et  
205 al. 2015) were used. Each reaction consisted of 0.5  $\mu$ L of the PCR product from the first reaction  
206 added to 13.375  $\mu$ L molecular grade water, 5  $\mu$ L of GoTaq Flexi buffer (Promega Corporation,  
207 Madison, Wisconsin, USA), 2  $\mu$ L of dNTPs (2.5 mM each), 1.5  $\mu$ L of 25 mM MgCl<sub>2</sub>, 1.25  $\mu$ L of  
208 each primer (20  $\mu$ M each), and 0.25  $\mu$ L of GoTaq polymerase. Cycling conditions for the second

209 PCR were: 95°C for 10 min; 45 cycles of 95°C for 30 sec, 56°C for 30 sec, and 72°C for 1 min;  
210 final extension at 72°C for 5 min. Products from the second PCR were visualized on an agarose  
211 gel, and those containing bands were sequenced in both directions using the Sanger method with  
212 primers ITS3 and Oo-rt-ITS-R.

213 Samples that generated messy chromatograms or appeared to contain single nucleotide  
214 polymorphisms (SNPs) indicative of multiple *O. ophidiicola* genotypes were re-amplified with  
215 the second PCR using a proofreading polymerase (15.75 µL of molecular grade water, 5 µL of  
216 5x SuperFi buffer [Thermo Fisher Scientific Corporation, Waltham, Massachusetts, USA], 2 µL  
217 of dNTPs (2.5 mM each), 0.625 µL of 20 µM each primer, 0.5 µL of Platinum SuperFi DNA  
218 polymerase [2U/µL], and 0.5 µL of product from the first PCR; cycling conditions were the  
219 same as described for the second reaction above). The resulting amplicons were cloned using the  
220 Invitrogen Zero Blunt TOPO PCR cloning kit for sequencing (Thermo Fisher Scientific  
221 Corporation, Waltham, Massachusetts, USA), and individual transformants were sequenced.

222 Individual ITS2 sequences generated in our study were assigned to genotypes. Sequences  
223 with 100% identity across the ITS2 region of *O. ophidiicola* were considered to be the same  
224 genotype; any sequence differing from another by at least one SNP was classified as a unique  
225 genotype.

226

#### 227 *(e) Quantification of disease severity*

228 Disease severity was measured by calculating the percentage of surface area of each snake  
229 covered by lesions. Using the image processing program ImageJ (Schneider et al. 2012) and the  
230 photos of the snakes taken in the field, we measured each lesion five times and recorded the  
231 mean length and width. We calculated the surface area of each lesion on a particular snake and

232 added up the surface area of each lesion to determine the total lesion surface area. Using the  
233 morphometric measurements collected in the field, we also calculated each snake's total surface  
234 area from the snout to the tail tip. We then calculated the percentage of total surface area covered  
235 by lesions. We also quantified disease severity following a previously described SFD scoring  
236 system (Baker et al. 2019) using a combination of lesion type, location, number, and coverage.  
237 Scores ranged from 4 (mild) to 12 (most severe). We compared the relationship between lesion  
238 score and percentage of total surface area covered by lesions (Fig. S1) and used lesion surface  
239 area as a more quantitative measure of severity as opposed to the ordinal metric in the final  
240 analyses to describe disease severity.

241

#### 242 *(f) Statistical analyses*

243 We analyzed data using Bayesian hierarchical models and we assessed statistical support  
244 using credible intervals that do not overlap zero. We fit all models (unless otherwise noted) using  
245 the No-U-Turn Sampler (NUTS), an extension of Hamiltonian Markov chain Monte Carlo  
246 (HMCMC). We created all Bayesian models in the Stan computational framework ([http://mc-](http://mc-stan.org/)  
247 [stan.org/](http://mc-stan.org/)) accessed with the “brms” package (Bürkner 2017). To improve convergence and avoid  
248 over-fitting, we specified weakly informative priors (a normal distribution with mean of zero and  
249 standard deviation of 10), unless otherwise noted. Models were run with a total of 4 chains for  
250 2000 iterations each, with a burn-in period of 1000 iterations per chain resulting in 4000  
251 posterior samples, which, given the more efficient NUTS sampler, was sufficient to achieve  
252 adequate mixing and convergence. All  $\hat{R}$  values were less than or equal to 1.01, indicating model  
253 convergence. We performed all statistical analyses in R software version 4.2.0 (R Core Team  
254 2022).

255 To examine hotspots (i.e., relative disease risk) of the pathogen *O. ophidiicola* across  
256 Europe, we used the Getis-Ord  $G_i^*$  analysis with Local Indicators of Spatial Association (LISA)  
257 statistics in the open-source Geographic Information System QGIS (version 3.22.10). A grid map  
258 of 100 km x 100 km was created across the landscape to aggregate point data and look at  
259 significant spatial clustering of neighboring features (each square) using the resultant z-scores  
260 and p-values. A heatmap was created to visualize the *O. ophidiicola* infection risk zone using a  
261 kernel density estimation with a quartic kernel shape and kernel radius of 100 km in QGIS. To  
262 investigate the effect of host species on pathogen prevalence, we used a Bayesian multilevel  
263 model with a Bernoulli distribution, pathogen detection as our response variable (0|1), species as  
264 our predictor variables, and a group-level effect of site. We excluded any species that had been  
265 sampled fewer than four times. We ran a similar model as described above with genus instead of  
266 species and included species as a group-level effect.

267 To investigate differences in lesion prevalence and disease severity in snakes that were  
268 qPCR positive, we first ran a multilevel model with a Bernoulli distribution, with detection of  
269 lesions on a snake in the field (0|1) as our response variable, species as our predictor variable,  
270 and a group-level effect of site. To examine differences in disease severity for the snakes that  
271 were positive for *O. ophidiicola*, our response variable was each square millimeter of surface  
272 area of the snake, which was treated as Bernoulli trials in a binomial sample (1 = lesion present  
273 or 0 = no lesion), and our group-level effects were individual snake and site. We performed a  
274 comparison between our lesions severity metric (percent of body covered in lesion) and  
275 previously described lesion scoring system (Baker et al. 2019), using a hierarchical model with  
276 the scoring system as our response variable, and the fraction of skin covered in lesions as our  
277 predictor with a Poisson distribution.

278 We examined the best model that explained *O. ophidiicola* prevalence across the  
279 landscape using leave-one-out cross-validation (LOO). The multilevel models included the  
280 population level effects of just species, just pathogen clade, an additive model of species and  
281 clade, and an interactive model of species and clade, with a Bernoulli distribution, pathogen  
282 detection as our response variable (0|1), and with site as a group-level effect for all four models.  
283 Models were run with a total of 4 chains for 6000 iterations each, with a burn-in period of 1500  
284 iterations per chain resulting in 18000 posterior samples. We pooled the four genotypes together  
285 (i.e., I-A, I-B, II-D/E and II-F) into two clades (clade I and II) as sample sizes were generally too  
286 small across species to look at separately. The clade variable consisted of either clade I (sites  
287 where only snakes infected with clade I were detected) or both clades I and II (sites where snakes  
288 were infected with either clade I or clade II, as there were only a few locations with detections of  
289 only clade II). The final clade dataset used for this analysis included 16 sites and 751 snakes.  
290 Prevalence by pathogen clade comparisons are only reported for four species (*N. natrix*, *N.*  
291 *tessellata*, *N. helvetica*, and *Z. longissimus*) for which there was sufficient data. To further  
292 examine the contribution of host species and pathogen clade to disease hotspots we also ran the  
293 analysis as described above with the addition of a spatial conditional autoregressive (CAR) term  
294 in “brms”. Finally, to examine how pathogen clade influenced infection severity, we performed  
295 an analysis where our response variable was each square millimeter of surface area of the snake,  
296 which was treated as a Bernoulli trial in a binomial sample and our predictor was pathogen clade,  
297 with a group-level effect of individual snake and species.

298

## 299 **6. Results**

300 We captured 1254 individual snakes from 21 species representing 6 genera (Fig. 1, Table  
301 S1). A total of 2628 swabs were collected, including 2357 full body skin swabs and 271 lesion  
302 swabs. Overall, *O. ophidiicola* prevalence confirmed by qPCR was 8.7% (n = 109 positive  
303 snakes) and prevalence was highly variable across the landscape. The hotspot analysis confirmed  
304 that sites in Switzerland and across the border in France (Franche-Comte) have elevated  
305 pathogen prevalence compared to surrounding areas (99% confidence interval, Z-score  $\geq 2.58$ ; p  
306  $\leq 0.01$ , Fig. 1 and S2), as well as sites sampled in southern Germany, eastern Austria, and eastern  
307 Ukraine, but to a lesser extent (95% confidence interval,  $1.96 \leq Z \text{ score} < 2.58$ ;  $0.01 < p \leq 0.05$ ).  
308 Other locations where *O. ophidiicola* was detected (Czech Republic, Hungary, and Poland) were  
309 not found to be significant hotspot (p > 0.05). Pathogen prevalence was highest in Switzerland  
310 (26.7%, Fig. 1, S3), followed by Germany (12.5%, Fig. S3) and Ukraine (12.1%, Fig. S3).  
311 Poland and the Iberian Peninsula (Spain and Portugal) had the lowest prevalence at 2.7%, 0.0%,  
312 and 0.0% respectively, despite comparable sample sizes to other locations (Table S1).

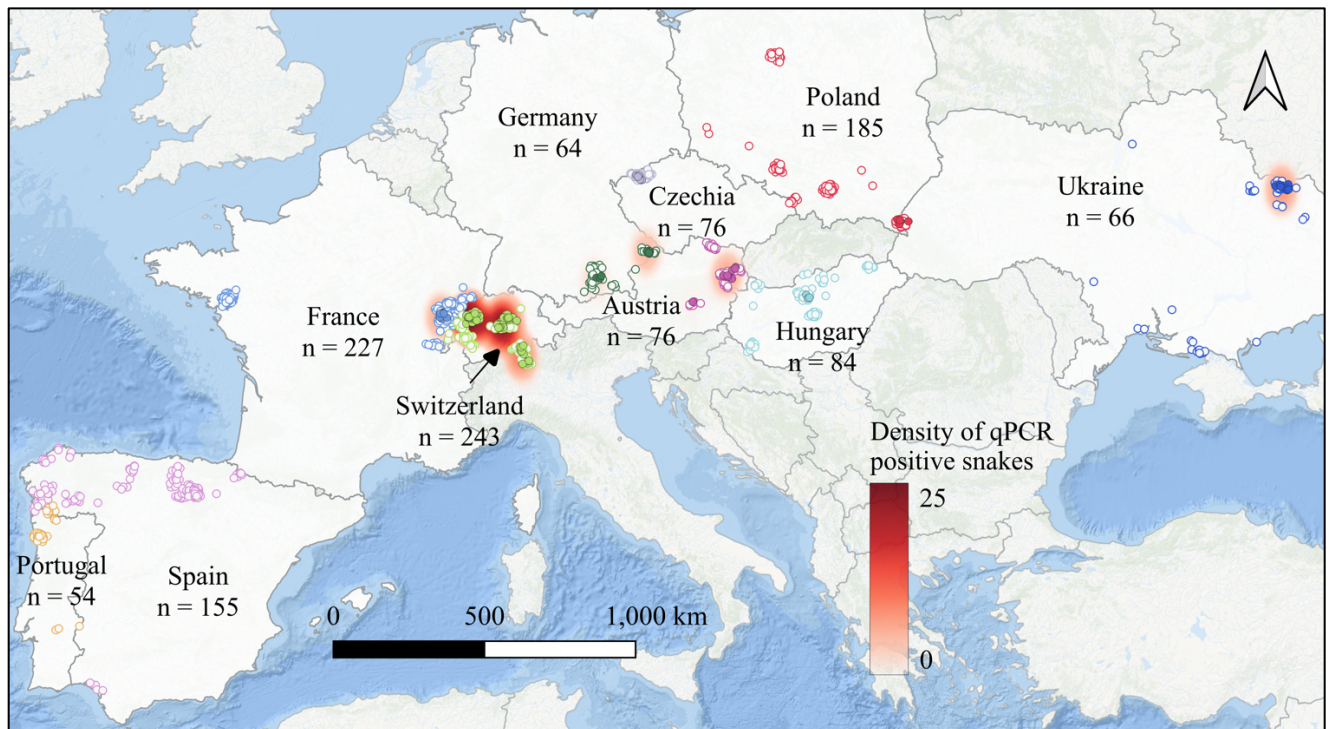

314 **Figure 1. Spatial distribution of snake captures and detections of *O. ophidiicola* across**  
315 **Europe.** Each circle represents an individual snake capture and overlapping points were slightly  
316 jittered for visualization. Different colors are used to distinguish countries, filled points indicate  
317 snakes that were qPCR positive, and outlined points are qPCR negative snakes. Underlying  
318 density heatmap shows spatial distribution of *O. ophidiicola* infection risk based on qPCR  
319 positive detections using a kernel density estimation algorithm for visualization. We used a 100-  
320 km radius around each positive point and the scale bar indicates point density (i.e. relative  
321 disease risk) across each region.

322

323 In addition to geographic variation, differences in *O. ophidiicola* prevalence were  
324 considerable among hosts (Fig. S4). We found statistical support (results formatted as coefficient  
325  $\pm$  standard deviation (95% credible intervals)) that species in the *Natrix* genus had higher  
326 prevalence (8.2%; intercept:  $-2.51 \pm 0.50$  (-3.62, -1.67)) than other genera sampled (0.7%,  
327 *Coronella* coeff:  $-3.13 \pm 1.23$  (-6.07, -1.24); 0.3%, *Dolichophis* coeff:  $-8.64 \pm 5.60$  (-22.53, -  
328 0.99); 0.2%, *Vipera* coeff:  $-4.05 \pm 0.87$  (-5.95, -2.53)), except for *Hierophis* and *Zamenis* (4.2%  
329 and 5.9 %, coeffs:  $-0.81 \pm 0.48$  (-1.79, 0.10) and  $-0.41 \pm 0.43$  (-1.27, 0.39), respectively). There  
330 was also large variation in pathogen prevalence among congeneric species. *Natrix tessellata* had  
331 higher *O. ophidiicola* prevalence (model prediction:  $15.8 \pm 6.2\%$ ; Fig. 2 and Table S2) compared  
332 to several other members of the *Natrix* genus including *Natrix astreptophora* (0.6%, coeff:  $-8.5 \pm$   
333  $5.8$  (-21.77, -0.39)), and *Natrix maura* (2.0%, coeff:  $-2.66 \pm 1.31$  (-5.7, -0.56), but there was no  
334 statistical support for differences from *Natrix helvetica* (13.7%, coeff:  $-0.16 \pm 0.38$  (-0.9, 0.58))  
335 or *Natrix natrix* (7.6%, coeff:  $-0.75 \pm 0.49$  (-1.73, 0.23)); Fig. 2 and Table S2).

336

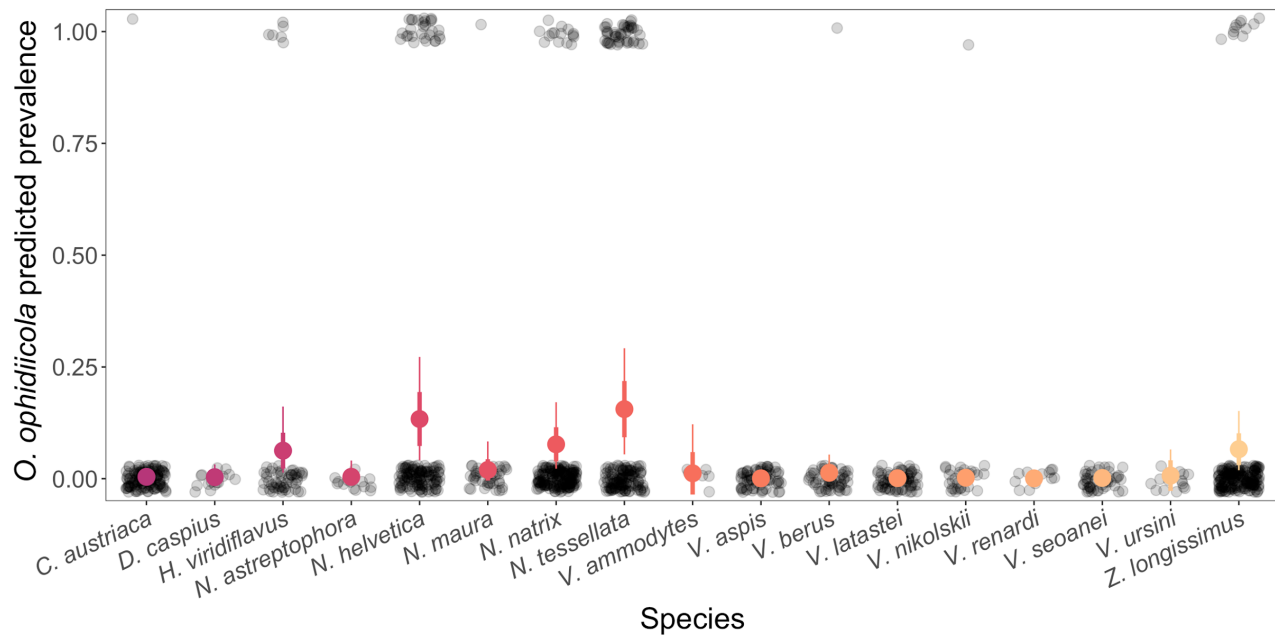

337 **Figure 2. Prevalence of *O. ophidiicola* in different species of snakes across Europe.** Each  
338 black circle represents a single snake as being either negative (0) or positive (1), which was then  
339 used to calculate pathogen prevalence (fraction of the population that was positive). Larger  
340 circles and whiskers show the model predicted posterior mean  $\pm$  standard deviation (thick lines),  
341 and 95% credible intervals (thin lines) for each species across all countries. Colors indicate  
342 different species.

343

344 Overall, skin lesions were observed in 187 snakes from 15 species across all countries,  
345 but only 46.5% of those tested positive by qPCR ( $n = 87$ ). Of all the snakes that tested positive  
346 by qPCR ( $n = 109$ ), 80% of those had skin lesions that were consistent with SFD, while the other  
347 20% had no visible skin lesion ( $n = 22$ ) (Fig. 3a, Fig. S5). We found a high probability of finding  
348 lesions on a snake if they tested positive for *O. ophidiicola* (range 46.2% – 92.8%, except for  
349 two viper species which had no visual sign of disease, Fig. 3a). We observed variation in disease  
350 severity but no statistical support for differences among species (Fig. 3b, Table S3).



351  
352  
353  
354  
355  
356  
357  
358  
359  
360  
361  
362  
363  
364  
365  
366

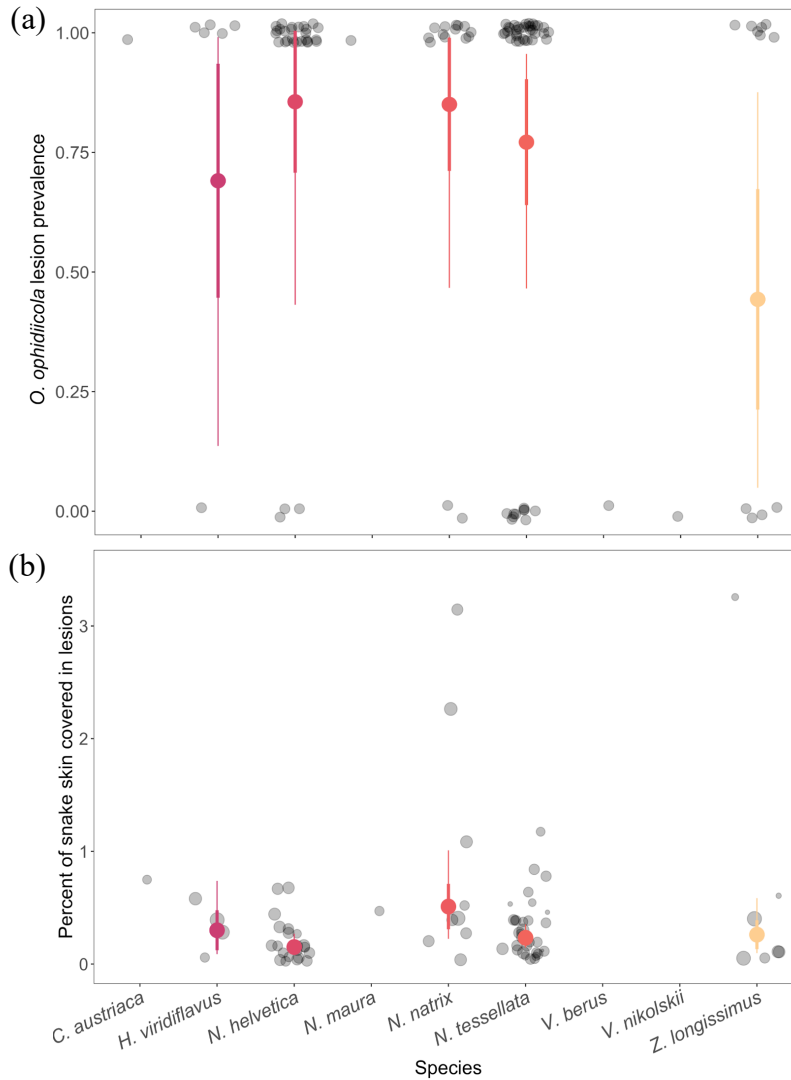

367 **Figure 3. Lesion prevalence (a) and disease severity (b) in *O. ophidicola*-positive snakes**  
368 **across different species.** Color circles and whiskers show the model predicted posterior mean,  $\pm$   
369 standard deviation (thick lines), and 95% credible intervals (thin lines) for different species  
370 across all countries. (a) Each black circle represents a single snake as being either negative (0) or  
371 positive (1) for presence of lesions, which was used to calculate the proportion of the population  
372 that tested positive (prevalence). (b) Each black circle represents the percentage of the body of a

373 single snake covered in lesions and the size of the circle is proportional to the total surface area  
374 of the snake (scale ranges 250 – 1,000 cm<sup>2</sup>).

375

376 Genotyping analyses were successful for 85.3% of positives swabs (93 total swab  
377 samples) that were qPCR positive for *O. ophidiicola*. A total of four unique genotypes were  
378 observed, belonging to two of the major *O. ophidiicola* clades (clade I & II, (Ladner et al. 2022))  
379 (Table S4). Two of these genotypes (designated here as I-A and I-B) resided within clade I (i.e.,  
380 the “European clade”). What we refer to as genotype I-A had an ITS2 sequence identical to  
381 strains previously isolated from Great Britain, while genotype I-B had an ITS2 region sequence  
382 identical to a strain from Czechia (Franklinos et al. 2017). The remaining two genotypes that we  
383 observed in our study resided within clade II (i.e., the “North American clade”) and were  
384 identical to ITS2 region sequences of clonal lineages II-D/E (lineages D and E have identical  
385 sequences in the ITS2 region) and II-F (Ladner et al. 2022). Here we refer to these genotypes as  
386 II-D/E and II-F, respectively, although strains detected in this study may not be true  
387 representatives of the clonal lineages reported from North America since recombinant strains can  
388 have identical ITS2 sequences as clonal lineages (Ladner et al. 2022). We found that both clade I  
389 and clade II are present across much of continental Europe, ranging from eastern France to  
390 eastern Ukraine; however, both clades were not present in all locations where *O. ophidiicola* was  
391 detected. Genotype I-A was detected primarily in western Europe (Switzerland, Germany, and  
392 Austria), whereas genotype I-B was detected in eastern Europe (Czechia, Austria, Hungary,  
393 Poland, and Ukraine) (Fig. 4a). Genotype II-D/E was more widely distributed across Europe,  
394 whereas genotype II-F was only found along a single lake in Switzerland (Fig. 4a). On two  
395 occasions, snakes were found to be infected with multiple genotypes of *O. ophidiicola*: a snake

396 from Switzerland from which genotypes I-A and II-D/E were detected and a snake from Hungary  
397 from which genotypes I-A and I-B were detected.

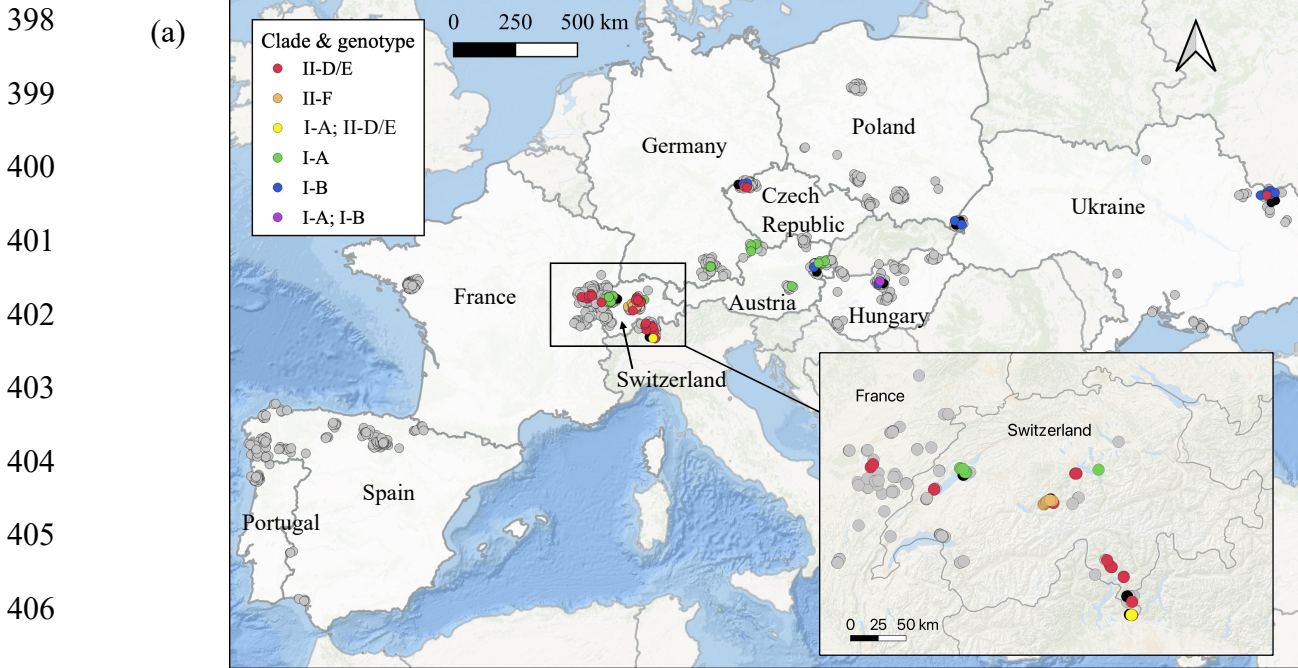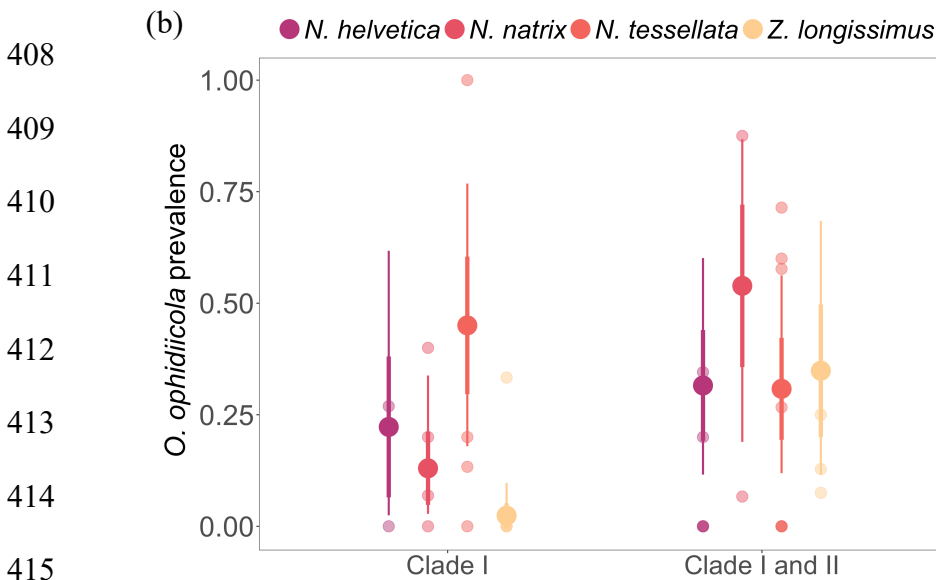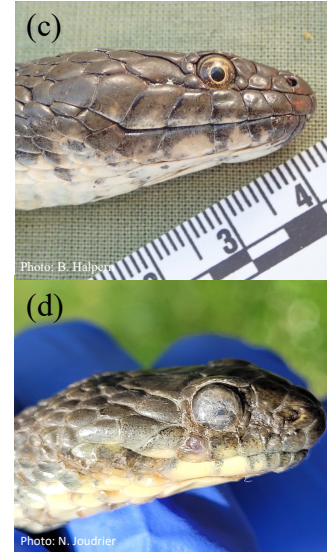

416 **Figure 4. Distribution of *O. ophidiicola* clades across Europe.** (a) *O. ophidiicola* clades and  
417 lineages from positive detections across the landscape in Europe. Points are slightly jittered for  
418 better visual representation of the sampling range. Color of the point indicates the clades and

419 genotypes, samples that were qPCR negative are represented as grey points, and samples that  
420 failed to amplify with the genotyping PCR are represented as black points. Yellow and purple  
421 points represent simultaneous detections of genotypes I-A and II-D/E and genotypes I-A and I-B,  
422 respectively, from the same swab sample (i.e., snakes infected with multiple genotypes). The  
423 enlarged map (inset) shows better resolution of detections in Switzerland. (b) *O. ophidiicola*  
424 prevalence across snake species based on *O. ophidiicola* clade presence at the different sites.  
425 Small color points are mean prevalence at a site for a given species and clade. Large color points  
426 and whiskers show the model predicted posterior mean,  $\pm$  standard deviation (thick lines), and  
427 95% credible intervals (thin lines) across different species. (c) Photo of a *N. tessellata* from  
428 Hungary infected with *O. ophidiicola* from clade I-B. (d) Photo of a *N. tessellata* from  
429 Switzerland infected with *O. ophidiicola* from clade II-F showing facial infection.

430

431 The top two models, as determined through LOO, that best predicted *O. ophidiicola*  
432 prevalence across the landscape included both host species and pathogen clade as predictor  
433 variables, with the best fit model including an interaction between these two variables (Table  
434 S5). There was statistical support that *N. natrix* and *Z. longissimus* have higher probabilities of  
435 being infected when clade II was detected at a site compared to just clade I (*N. natrix* coeff:  $2.09$   
436  $\pm 1.09$  (0.05, 4.27), *Z. longissimus* coeff:  $3.15 \pm 1.23$  (0.84, 5.69)). A third species, *N. helvetica*,  
437 was associated with higher probability of infection when clade II was detected at a site, but the  
438 credible intervals included zero (coeff:  $0.64 \pm 1.16$  (-1.59, 3.03)). Conversely, we found that the  
439 species with the highest pathogen prevalence, *N. tessellata*, had no differences in infection  
440 probability based on clade (Fig. 4b, Table S6). Results from the spatial regression resulted in  
441 qualitatively similar results, where both species present and pathogen clade were important

442 predictors of pathogen prevalence (*N. natrix* coeff:  $1.10 \pm 0.75$  (-0.73, 2.35), *Z. longissimus*  
443 coeff:  $1.74 \pm 0.85$  (0.10, 3.44), *N. helvetica* coeff:  $0.09 \pm 0.44$  (-0.72, 0.95)), except for *N.*  
444 *tessellata* (coeff:  $-0.59 \pm 0.54$  (-1.66, 0.42)) (Table S7). Snakes that were infected by a strain of  
445 *O. ophidiicola* belonging to clade I generally had less severe disease when compared to snakes  
446 infected with a strain from clade II, although there was no strong statistical support as the  
447 credible intervals overlapped zero (clade I coeff:  $-0.10 \pm 0.34$  (-0.77, 0.57), Fig. S6).

448

#### 449 **4. Discussion**

450 Our results support the presence of hotspots for SFD across Europe and the potential  
451 factors that contribute to higher infection prevalence. *O. ophidiicola* was detected in all countries  
452 studied except for those on the Iberian Peninsula (Spain and Portugal), which may be attributed  
453 to numerous factors (e.g. different species community, geographical barriers (Pyrenees  
454 mountains), or environmental conditions) that may be unsuitable for persistence and growth of  
455 *O. ophidiicola*. Our surveys establish four regions with elevated prevalence of *O. ophidiicola* in  
456 Europe, with the highest being in Switzerland.

457 Snake fungal disease has garnered much attention over the last few decades, as this  
458 disease has negatively affected snake populations (Allender et al. 2015, Lorch et al. 2016).  
459 Despite this, few studies have systematically examined differences in disease severity and  
460 prevalence across species. We found high variability of infection prevalence among snake  
461 species, irrespective of the sampling location. Snakes in the *Natrix* genus had a higher  
462 probability of infection compared to other genera, indicating that species in this genus may be  
463 more susceptible to *O. ophidiicola* infections and are likely to be important in maintaining  
464 elevated pathogen prevalence in a region. Underlying host characteristics such as dependence on

465 aquatic habitats, have previously been found to be associated with higher *O. ophidiicola*  
466 infection prevalence (McKenzie et al. 2019), which could partly explain increased infection in  
467 this genus. *Natrix tessellata* had the highest pathogen prevalence, followed by *N. helvetica* and  
468 *N. natrix*, with all three species being either semiaquatic or living near water (with *N. tessellata*  
469 being more piscivorous). Interestingly, only two vipers (out of a total of 341 samples) tested  
470 positive for *O. ophidiicola*, and both snakes had no visual signs of infection (i.e. no lesions  
471 present). This indicates that viperids may not be competent hosts for *O. ophidiicola*, possibly due  
472 to environmental associations or behavioral and physiological mechanisms. Contrary to this,  
473 North American pit vipers, such as the massasauga rattlesnake (*Sistrurus catenatus*), have been  
474 reported to develop severe clinical signs of SFD (Allender et al. 2011). This could be attributed  
475 to a sampling bias from more intensive monitoring of threatened rattlesnake species, or  
476 rattlesnakes may have increased susceptibility to SFD due to their habitat requirements  
477 (massasauga rattlesnakes are found near swamps and marshes) compared to European vipers,  
478 which are generally associated with drier environments (except for *V. berus* which can be  
479 associated with cool and humid habitats).

480 In our study, no mortality was reported, and snakes generally appeared healthy except in  
481 a few cases where infection was severe and had spread to the face with possible disruption to  
482 foraging behavior (Fig. S4). The low disease severity observed in Europe could be the result of  
483 increased host resistance or generally lower pathogen virulence. We also found that only 46% of  
484 snakes with lesions tested positive for *O. ophidiicola*, which has also been reported from North  
485 America (Chandler et al. 2019, Haynes et al. 2020). The lesions that could not be attributed to *O.*  
486 *ophidiicola* infection looked similar to SFD skin lesions and may be fungal or bacterial in origin

487 (Dubey et al. 2022). Further research investigating other sublethal effects of SFD and the  
488 interaction between *O. ophidiicola* and other pathogens is important.

489 We found that models accounting for both host species and pathogen clade best explained  
490 the variation in pathogen prevalence across the landscape. Importantly, the top model included  
491 an interaction between host species and pathogen clade, indicating that the effect of clade is not  
492 the same across species. Clade II was found in two of the four pathogen hotspots across Europe,  
493 and generally when clade II was present in an area, we found support that the probability of  
494 detecting *O. ophidiicola* was higher for three (*N. natrix*, *Z. longissimus*, and *N. helvetica*) of the  
495 four species with the highest prevalence. Hotspots in Switzerland were primarily driven by *N.*  
496 *tessellata*, which showed no difference in detection based on whether just clade I or both clades I  
497 and II were present. This indicates that *N. tessellata* may be equivalently susceptible to both  
498 clades I and II or that other factors may be contributing to infection probability in this species.

499 The history and origin of *O. ophidiicola* in Europe is unclear. Sampling of museum  
500 specimens has revealed that strains of *O. ophidiicola* belonging to clades I and II were present in  
501 Switzerland as early as 1959 (Origgi et al. 2022). It is estimated that clade I shared a common  
502 ancestor within the last 100 to 500 years, but that analysis only included four clade I strains and  
503 may greatly underestimate the time that *O. ophidiicola* has been present in Europe (Ladner et al.  
504 2022). Despite the designation of clade II as the “North American” clade, it is believed that *O.*  
505 *ophidiicola* is not native to North America and multiple introductions (most likely from Eurasia)  
506 have occurred over the last century (Ladner et al. 2022). Thus, it is plausible that either or both  
507 clades I and II are native to Europe. Strains of *O. ophidiicola* isolated from wild snakes in  
508 Taiwan reside within clade II (Sun et al. 2021, Ladner et al. 2022), which could also indicate a  
509 southeast Asian origin for that clade, raising the possibility that clade II is not native to Europe.

510 Clade II has been detected on captive snakes in Europe (Ladner et al. 2022), which could serve  
511 as a source for transmission into wild populations. An introduction of clade II into Europe  
512 sometime before 1960 and subsequent spread could explain the wide distribution of this clade as  
513 detected in our sampling. We detected two genotypes within clade II. One of these (II-D/E) was  
514 widely distributed, whereas the other (II-F) was detected in a single snake community around a  
515 lake in Switzerland. That snake community includes an introduced population of *N. tessellata*.  
516 Taken together, this could indicate that genotype II-F was more recently introduced to Europe,  
517 perhaps through the release of snakes originating in captivity. However, determining the genetic  
518 diversity and origin of the various lineages of *O. ophidiicola* in Europe would require more in-  
519 depth studies.

520 We find several disease hotspots in Europe, which could be attributed, at least partially,  
521 to specific host species and the presence of distinct pathogen clades. The shape of this  
522 relationship varied among areas with higher disease prevalence, and in some cases, host species  
523 had higher infections regardless of pathogen genotypes, and others were likely attributed to the  
524 presence of specific susceptible hosts infected with a pathogen clade that may be more  
525 transmissible. Although virulence is recognized as an important factor in the effects of disease on  
526 host populations, the general lack of landscape level data on pathogen lineage distribution and  
527 association with disease has likely limited our ability to determine its importance for other  
528 disease hotspots.

529

### 530 **Ethics**

531 Handling of snakes was reviewed and approved by Virginia Tech Institute for Animal Care and  
532 Use Committee protocol 20-055. Permits to conduct our field study were obtained when



533 necessary, and were granted by the Regional office of the Karlovarian region, Department of  
534 Environment and Agriculture in Czech Republic (permit # KK/1098/ZZ/20-4), the General and  
535 Regional Directorates of Nature Conservation in Poland (permit # DZP- WG.6401.91.2020.TŁ;  
536 DZP-WG.6401.91.2020.TŁ.2, WPN.6401.270.2019.MF, WPN.6401.17.2020.KW.2,  
537 WPN.6401.9.2021.KW.2), Portuguese and Spanish wildlife legislation (permits #  
538 295/2020/CAPT, 146/2021/CAPT, 201999902471003/IRM/MDCG/mes, EB-018/2020, EB-  
539 015/2021, AUES/CYL/192/2020, AUES/CYL/54/2021, A/2021/036, 0001-0261-2021-000003),  
540 the Direction régionale de l'environnement of Franche-Comte (ONAGRE 2020-01-17-00122;  
541 25-2022-02-17-00001) and Loire-Atlantique (Cerfa 13616, permit # 64/2016) in France, the  
542 Museum of Natural History in Budapest, Hungary (permit # PE-KTFO/1568-18/2020), Austrian  
543 legislations (permits # MA22 – 1089768-2020, RU5-BE-64/023-2022, RU5-BE-64//022-2021,  
544 ABT13-53W-50/2018-2), the Federal Office for the Environment (FOEN) in Switzerland with  
545 veterinary authorization (VD3718, ID 33612), and cantonal authorizations (Neuchatel: FS-  
546 08/2021, Grisons: AV-2022-338, Vaud: 2021-3537).

547

## 548 **Funding**

549 This material is based upon work supported by the National Science Foundation Graduate  
550 Research Fellowship under Grant No. 480040. Additional funding to GB was provided by a  
551 Virginia Tech Cunningham fellowship, and a CeZAP (Center for Emerging, Zoonotic, and  
552 Arthropod-borne Pathogens) grant as part of the Infectious Diseases (ID) Interdisciplinary  
553 Graduate Education Program (IGEP). FM-F is supported by FCT - Fundação para a Ciência e a  
554 Tecnologia, Portugal (contract ref. DL57/2016/CP1440/CT0010). Sampling in Poland was  
555 funded by the statutory funds of the Institute of Nature Conservation, Polish Academy of

556 Science. Sampling in Hungary was supported by Duna-Ipoly National Park, Duna-Dráva  
557 National Park, Aggtelek National Park, and LIFE HUNVIPHAB project  
558 (LIFE18NAT/HU/000799). Sampling in France was funded by the Agence de l'eau Rhône-  
559 Méditerranée-Corse, Région Bourgogne-Franche-Comté, DREAL Bourgogne-Franche-Comté,  
560 Département du Jura, Doubs and Territoire de Belfort, and UNICEM (to AM and TC), and by  
561 the Regional Council of Nouvelle-Aquitaine and Aquastress project (2018-1R20214 to OL).

562

### 563 **Acknowledgements**

564 We thank Otto Aßmann, Florian Bacher, Jacek Błachuta, Philomin Briot, Jon Buldain, Maxime  
565 Chèvre, Pierre Cheveau, Sylvain Dubey, Anna Egerer, Lea Endrejat, Karin Ernst, Niklas  
566 Franzen, Inês Freitas, Georg Gassner, Davy Guinchard, Krisztián Harnos, Marietta Hengl, Piotr  
567 Hubal, Kacper Jurczyk, Yurii Kornilev, Roman Kurek, Nahla Lucchini, Adrian Neumann,  
568 Daniel Renner, Sandra Wallner, and Bartłomiej Zajac for assistance in the field. Many thanks  
569 also to Kate Langwig for statistical insights, and to Oleksandra Klynova and Megan Winzeler for  
570 laboratory assistance.

571

### 572 **Author contributions**

573 GB: conceptualization, data curation, investigation, formal analysis, visualization, methodology,  
574 writing—original draft, writing—review and editing; JML: methodology, investigation,  
575 writing—review and editing; NJ: methodology, resources, investigation, writing—review and  
576 editing; SB: investigation, resources, writing—review and editing; TC: methodology,  
577 investigation, writing—review and editing; MF: investigation, writing—review and editing; FM-  
578 F: investigation, writing—review and editing; GG: investigation, writing—review and editing;

579 BH: investigation, writing—review and editing; AK: investigation, writing—review and editing;  
580 KK: investigation, writing—review and editing; OL: investigation, writing—review and editing;  
581 AM: methodology, investigation, writing—review and editing; RM: investigation, writing—  
582 review and editing; SS: investigation, review and editing; BS: investigation, writing—review and  
583 editing; SU: methodology, resources, investigation, writing—review and editing; OZ:  
584 investigation, writing—review and editing; JRH: conceptualization, resources, supervision,  
585 funding acquisition, writing—review and editing.

586

587 **Disclaimer**

588 Any use of trade, firm, or product names is for descriptive purposes only and does not imply  
589 endorsement by the U.S. Government.

590

591 **Data availability statement:** The datasets and code generated for this study will be made  
592 available in Dryad Digital Repository upon final submission.

593

594 **Conflict of interest declaration**

595 The authors declare no competing interests.

596

597 **References:**

598 Allender, M. C., M. Dreslik, S. Wylie, C. Phillips, D. B. Wylie, C. Maddox, M. A. Delaney, and  
599 M. J. Kinsel. 2011. *Chrysosporium* sp. infection in eastern massasauga rattlesnakes.  
600 Emerging Infectious Diseases **17**:2383.

- 601 Allender, M. C., D. B. Raudabaugh, F. H. Gleason, and A. N. Miller. 2015. The natural history,  
602 ecology, and epidemiology of *Ophidiomyces ophiodiicola* and its potential impact on  
603 free-ranging snake populations. *Fungal Ecology* **17**:187-196.
- 604 Allender, M. C., M. J. Ravesi, E. Haynes, E. Ospina, C. Petersen, C. A. Phillips, and R. Lovich.  
605 2020. Ophidiomycosis, an emerging fungal disease of snakes: Targeted surveillance on  
606 military lands and detection in the western US and Puerto Rico. *PLoS One* **15**:e0240415.
- 607 Ashford, R. W. 2003. When is a reservoir not a reservoir? *Emerg Infect Dis* **9**:1495-1496.
- 608 Baker, S. J., E. Haynes, M. Gramhofer, K. Stanford, S. Bailey, M. Christman, K. Conley, S.  
609 Frasca, R. J. Ossiboff, and D. Lobato. 2019. Case definition and diagnostic testing for  
610 snake fungal disease. *Herpetological Review* **50**:279-285.
- 611 Balaz, V., J. Vörös, P. Civis, J. Vojar, A. Hettyey, E. Sos, R. Dankovics, R. Jehle, D. G.  
612 Christiansen, F. Clare, M. C. Fisher, T. W. Garner, and J. Bielby. 2014. Assessing risk  
613 and guidance on monitoring of *Batrachochytrium dendrobatidis* in Europe through  
614 identification of taxonomic selectivity of infection. *Conserv Biol* **28**:213-223.
- 615 Becker, C. G., S. E. Greenspan, K. E. Tracy, J. A. Dash, C. Lambertini, T. S. Jenkinson, D. S.  
616 Leite, L. F. Toledo, J. E. Longcore, T. Y. James, and K. R. Zamudio. 2017. Variation in  
617 phenotype and virulence among enzootic and panzootic amphibian chytrid lineages.  
618 *Fungal Ecology* **26**:45-50.
- 619 Bohuski, E., J. M. Lorch, K. M. Griffin, and D. S. Blehert. 2015. TaqMan real-time polymerase  
620 chain reaction for detection of *Ophidiomyces ophiodiicola*, the fungus associated with  
621 snake fungal disease. *BMC Veterinary Research* **11**:95.
- 622 Brown, V. L., J. M. Drake, D. E. Stallknecht, J. D. Brown, K. Pedersen, and P. Rohani. 2013.  
623 Dissecting a wildlife disease hotspot: the impact of multiple host species, environmental

- 624 transmission and seasonality in migration, breeding and mortality. *J R Soc Interface*  
625 **10**:20120804.
- 626 Burbrink, F. T., J. M. Lorch, and K. R. Lips. 2017. Host susceptibility to snake fungal disease is  
627 highly dispersed across phylogenetic and functional trait space. *Science Advances*  
628 **3**:e1701387.
- 629 Bürkner, P. C. 2017. brms: An R package for Bayesian multilevel models using Stan. *Journal of*  
630 *Statistical Software* **80**:1-28.
- 631 Chandler, H. C., M. C. Allender, B. S. Stegenga, E. Haynes, E. Ospina, and D. J. Stevenson.  
632 2019. Ophidiomycosis prevalence in Georgia's Eastern Indigo Snake (*Drymarchon*  
633 *couperi*) populations. *PLoS One* **14**:e0218351.
- 634 Davy, C. M., L. Shirose, D. Campbell, R. Dillon, C. McKenzie, N. Nemeth, T. Braithwaite, H.  
635 Cai, T. Degazio, T. Dobbie, S. Egan, H. Fotherby, J. D. Litzgus, P. Manorome, S. Marks,  
636 J. E. Paterson, L. Sigler, D. Slavic, E. Slavik, J. Urquhart, and C. Jardine. 2021.  
637 Revisiting Ophidiomycosis (snake fungal disease) after a decade of targeted research.  
638 *Front Vet Sci* **8**:665805.
- 639 Dorcas, M. E., and J. D. Willson. 2009. Innovative methods for studies of snake ecology and  
640 conservation. *Snakes: Ecology and Conservation*:5-37.
- 641 Dubey, S., S. Pellaud, K. Gindro, J. Schuerch, J. Golay, R. Gloor, K. Ghali, and O. Dubey. 2022.  
642 Fungal infection in free-ranging snakes caused by opportunistic species. *Emerging*  
643 *Animal Species* **3**:100001.
- 644 Franklino, L. H., J. M. Lorch, E. Bohuski, J. R.-R. Fernandez, O. N. Wright, L. Fitzpatrick, S.  
645 Petrovan, C. Durrant, C. Linton, and V. Baláz. 2017. Emerging fungal pathogen  
646 *Ophidiomyces ophiodiicola* in wild European snakes. *Scientific Reports* **7**:1-7.

- 647 Gandon, S., and Y. Michalakis. 2000. Evolution of parasite virulence against qualitative or  
648 quantitative host resistance. *Proc Biol Sci* **267**:985-990.
- 649 Greener, M. S., E. Verbrugge, M. Kelly, M. Blooi, W. Beukema, S. Canessa, S. Carranza, S.  
650 Croubels, N. De Troyer, D. Fernandez-Giberteau, P. Goethals, L. Lens, Z. Li, G. Stegen,  
651 D. Strubbe, R. van Leeuwenberg, S. Van Praet, M. Vila-Escale, M. Vervaeke, F.  
652 Pasmans, and A. Martel. 2020. Presence of low virulence chytrid fungi could protect  
653 European amphibians from more deadly strains. *Nat Commun* **11**:5393.
- 654 Grioni, A., K. W. To, P. Crow, L. Rose-Jeffreys, L. O. Chu, F. I. Hill, H. K. Chan, and K. S.  
655 Cheung. 2021. Detection of *Ophidiomyces ophidiicola* in a wild Burmese python (*Python*  
656 *bivittatus*) in Hong Kong SAR, China. *The Journal of Herpetological Medicine and*  
657 *Surgery* **31**:283-291.
- 658 Hawley, D. M., E. E. Osnas, A. P. Dobson, W. M. Hochachka, D. H. Ley, and A. A. Dhondt.  
659 2013. Parallel patterns of increased virulence in a recently emerged wildlife pathogen.  
660 *PLoS Biol* **11**:e1001570.
- 661 Haydon, D. T., S. Cleaveland, L. H. Taylor, and M. K. Laurenson. 2002. Identifying reservoirs  
662 of infection: A conceptual and practical challenge. *Emerging Infectious Diseases* **8**:1468-  
663 1473.
- 664 Haynes, E., H. C. Chandler, B. S. Stegenga, L. Adamovicz, E. Ospina, D. Zerpa-Catanho, D. J.  
665 Stevenson, and M. C. Allender. 2020. Ophidiomycosis surveillance of snakes in Georgia,  
666 USA reveals new host species and taxonomic associations with disease. *Scientific*  
667 *Reports* **10**:1-15.

- 668 Holdo, R. M., A. R. E. Sinclair, A. P. Dobson, K. L. Metzger, B. M. Bolker, M. E. Ritchie, and  
669 R. D. Holt. 2009. A disease-mediated trophic cascade in the serengeti and its implications  
670 for ecosystem C. *Plos Biology* **7**.
- 671 Hyatt, A. D., D. G. Boyle, V. Olsen, D. B. Boyle, L. Berger, D. Obendorf, A. Dalton, K. Kriger,  
672 M. Hero, H. Hines, R. Phillott, R. Campbell, G. Marantelli, F. Gleason, and A. Colling.  
673 2007. Diagnostic assays and sampling protocols for the detection of *Batrachochytrium*  
674 *dendrobatidis*. *Diseases of Aquatic Organisms* **73**:175-192.
- 675 Kilpatrick, A. M., A. A. Chmura, D. W. Gibbons, R. C. Fleischer, P. P. Marra, and P. Daszak.  
676 2006. Predicting the global spread of H5N1 avian influenza. *Proceedings of the National*  
677 *Academy of Sciences of the United States of America* **103**:19368-19373.
- 678 Krauss, S., D. E. Stallknecht, N. J. Negovetich, L. J. Niles, R. J. Webby, and R. G. Webster.  
679 2010. Coincident ruddy turnstone migration and horseshoe crab spawning creates an  
680 ecological 'hot spot' for influenza viruses. *Proc Biol Sci* **277**:3373-3379.
- 681 LaDeau, S. L., A. M. Kilpatrick, and P. P. Marra. 2007. West Nile virus emergence and large-  
682 scale declines of North American bird populations. *Nature* **447**:710-713.
- 683 Ladner, J. T., J. M. Palmer, C. L. Ettinger, J. E. Stajich, T. M. Farrell, B. M. Glorioso, B.  
684 Lawson, S. J. Price, A. G. Stengle, D. A. Grear, and J. M. Lorch. 2022. The population  
685 genetics of the causative agent of snake fungal disease indicate recent introductions to the  
686 USA. *PLoS Biol* **20**:e3001676.
- 687 Laggan, N. A., K. L. Parise, J. P. White, H. M. Kaarakka, J. A. Redell, J. E. DePue, W. H.  
688 Scullon, J. Kath, J. T. Foster, A. M. Kilpatrick, K. E. Langwig, and J. R. Hoyt. 2022.  
689 Host abundance and heterogeneity in infectiousness determine extent of the  
690 environmental reservoir. *bioRxiv:2022.2009.2020.508714*.

- 691 Langwig, K. E., W. F. Frick, J. T. Bried, A. C. Hicks, T. H. Kunz, and A. M. Kilpatrick. 2012.  
692        Sociality, density-dependence and microclimates determine the persistence of  
693        populations suffering from a novel fungal disease, white-nose syndrome. *Ecol Lett* **15**.
- 694 Langwig, K. E., J. R. Hoyt, K. L. Parise, W. F. Frick, J. T. Foster, and A. M. Kilpatrick. 2017.  
695        Resistance in persisting bat populations after white-nose syndrome invasion.  
696        *Philosophical Transactions of the Royal Society B: Biological Sciences* **372**:20160044.
- 697 Li, K. S., Y. Guan, J. Wang, G. J. Smith, K. M. Xu, L. Duan, A. P. Rahardjo, P. Puthavathana, C.  
698        Buranathai, T. D. Nguyen, A. T. Estoepangestie, A. Chaisingh, P. Auewarakul, H. T.  
699        Long, N. T. Hanh, R. J. Webby, L. L. Poon, H. Chen, K. F. Shortridge, K. Y. Yuen, R. G.  
700        Webster, and J. S. Peiris. 2004. Genesis of a highly pathogenic and potentially pandemic  
701        H5N1 influenza virus in eastern Asia. *Nature* **430**:209-213.
- 702 Lorch, J. M., S. Knowles, J. S. Lankton, K. Michell, J. L. Edwards, J. M. Kapfer, R. A. Staffen,  
703        E. R. Wild, K. Z. Schmidt, and A. E. Ballmann. 2016. Snake fungal disease: an emerging  
704        threat to wild snakes. *Philosophical Transactions of the Royal Society B: Biological*  
705        *Sciences* **371**:20150457.
- 706 Marini, D., M. R. Di Nicola, V. Crocchianti, T. Notomista, D. Iversen, L. Coppari, M. Di  
707        Criscio, V. Brouard, J.-L. C. M. Dorne, J. Rüegg, and M. L. Marenzoni. 2023. Pilot  
708        survey reveals ophidiomycosis in dice snakes *Natrix tessellata* from Lake Garda, Italy.  
709        *Veterinary Research Communications*. <https://doi.org/10.1007/s11259-023-10129-7>
- 710 McClure, K. M., R. C. Fleischer, and A. M. Kilpatrick. 2020. The role of native and introduced  
711        birds in transmission of avian malaria in Hawaii. *Ecology* **101**:e03038.



- 712 McKenzie, J. M., S. J. Price, J. L. Fleckenstein, A. N. Drayer, G. M. Connette, E. Bohuski, and J.  
713 M. Lorch. 2019. Field diagnostics and seasonality of *Ophidiomyces ophiodiicola* in wild  
714 snake populations. *Ecohealth* **16**:141-150.
- 715 McLeod, D. V., and S. Gandon. 2022. Effects of epistasis and recombination between vaccine-  
716 escape and virulence alleles on the dynamics of pathogen adaptation. *Nat Ecol Evol*  
717 **6**:786-793.
- 718 Meier, G., T. Notomista, D. Marini, and V. Ferri. 2018. First case of Snake Fungal Disease  
719 affecting a free-ranging *Natrix natrix* (LINNAEUS, 1758) in Ticino Canton, Switzerland.  
720 *Herpetology Notes* **11**:885-891.
- 721 O’Hanlon, S. J., A. Rieux, R. A. Farrer, G. M. Rosa, B. Waldman, A. Bataille, T. A. Kosch, K.  
722 A. Murray, B. Brankovics, and M. Fumagalli. 2018. Recent Asian origin of chytrid fungi  
723 causing global amphibian declines. *Science* **360**:621-627.
- 724 Origgi, F. C., S. R. R. Pisano, O. Glazot, S. T. Hertwig, A. Schmitz, and S. Ursenbacher. 2022.  
725 *Ophidiomyces ophiodiicola*, the etiologic agent of snake fungal disease, is present in  
726 Europe since the late 1950’s. *Emerging Infectious Diseases* **28**.
- 727 Pandey, A., N. Mideo, and T. G. Platt. 2022. Virulence evolution of pathogens that can grow in  
728 reservoir environments. *Am Nat* **199**:141-158.
- 729 Paull, S. H., S. Song, K. M. McClure, L. C. Sackett, A. M. Kilpatrick, and P. T. J. Johnson.  
730 2012. From superspreaders to disease hotspots: linking transmission across hosts and  
731 space. *Frontiers in Ecology and the Environment* **10**:75-82.
- 732 R Core Team. 2022. R: A language and environment for statistical computing. R Foundation for  
733 Statistical Computing, Vienna, Austria. URL <https://www.R-project.org/>.

- 734 Ribeiro, L. P., T. Carvalho, C. G. Becker, T. S. Jenkinson, D. D. S. Leite, T. Y. James, S. E.  
735 Greenspan, and L. F. Toledo. 2019. Bullfrog farms release virulent zoospores of the frog-  
736 killing fungus into the natural environment. *Scientific Reports* **9**:13422.
- 737 Schneider, C. A., W. S. Rasband, and K. W. Eliceiri. 2012. NIH Image to ImageJ: 25 years of  
738 image analysis. *Nat Methods* **9**:671-675.
- 739 Sun, P. L., C. K. Yang, W. T. Li, W. Y. Lai, Y. C. Fan, H. C. Huang, and P. H. Yu. 2021.  
740 Infection with *Nannizziopsis guarroi* and *Ophidiomyces ophiodiicola* in reptiles in  
741 Taiwan. *Transboundary and Emerging Diseases* **69**:764-775.
- 742 Sutherland, W. J., R. Aveling, T. M. Brooks, M. Clout, L. V. Dicks, L. Fellman, E. Fleishman,  
743 D. W. Gibbons, B. Keim, and F. Lickorish. 2014. A horizon scan of global conservation  
744 issues for 2014. *Trends in ecology & evolution* **29**:15-22.
- 745 Urbina, J., E. M. Bredeweg, T. S. Garcia, and A. R. Blaustein. 2018. Host–pathogen dynamics  
746 among the invasive American bullfrog (*Lithobates catesbeianus*) and chytrid fungus  
747 (*Batrachochytrium dendrobatidis*). *Hydrobiologia* **817**:267-277.
- 748 van Riper, C., S. G. van Riper, M. L. Goff, and M. Laird. 1986. The epizootiology and  
749 ecological significance of malaria in Hawaiian land birds. *Ecological Monographs*  
750 **56**:327-344.
- 751 Voyles, J., S. Young, L. Berger, C. Campbell, W. Voyles, A. Dinudom, D. Cook, R. Webb, R.  
752 Alford, L. Skerratt, and R. Speare. 2009. Pathogenesis of chytridiomycosis, a cause of  
753 catastrophic amphibian declines. *Science* **326**:582 - 585.
- 754 White, T. J., T. Bruns, S. Lee, and J. Taylor. 1990. Amplification and direct sequencing of fungal  
755 ribosomal RNA genes for phylogenetics. Pages 315-322 *in* M. A. Innis, D. H. Gelfand, J.

756 J. Sninsky, and T. J. White, editors. PCR Protocols: A Guide to Methods and  
757 Applications. Academic Press Inc., San Diego, CA.  
758 Wilber, M. Q., P. T. J. Johnson, and C. J. Briggs. 2020. Disease hotspots or hot species?  
759 Infection dynamics in multi-host metacommunities controlled by species identity, not  
760 source location. *Ecol Lett* **23**:1201-1211.  
761
